# Supplementary material
Source: publisher figshare collection journal article supplement (https://sage.figshare.com/ndownloader/files/17773313)
Supplement: Supplementary file 1 [file 17773313]

All stimulus materials, data, and analysis syntax can be viewed through an anonymous link to an open source repository during the blind peer review process ([tinyurl.com/v6o2b5an](https://tinyurl.com/v6o2b5an)). They will be made publicly available after the review process.
